# Supplementary material for: A Circulating MicroRNA Signature Capable of Assessing the Risk of Hepatocellular Carcinoma in Cirrhotic Patients
Source: PubMed Central journal article supplement (PMC5428873; doi:10.1038/s41598-017-00631-9), 2017-03-31
Supplement: 41598_2017_631_MOESM1_ESM.pdf [file 41598_2017_631_MOESM1_ESM.pdf]

## Supplementary Information

### **A Circulating MicroRNA Signature Capable of Assessing the Risk of Hepatocellular Carcinoma in Cirrhotic Patients**

Ya-Hui Huang<sup>1,+</sup>, Kung-Hao Liang<sup>1,+</sup>, Rong-Nan Chien<sup>2</sup>, Tsung-Hui Hu<sup>3</sup>, Kwang-Huei Lin<sup>1,4</sup>,  
Chao-Wei Hsu<sup>1,4</sup>, Chih-Lang Lin<sup>1,2</sup>, Tai-Long Pan<sup>5,6</sup>, Po-Yuan Ke<sup>1,7</sup> and Chau-Ting Yeh<sup>1,4,8,\*</sup>

<sup>1</sup> Liver Research Center, Chang Gung Memorial Hospital, Linkou, Taoyuan, Taiwan

<sup>2</sup> Liver Research Unit, Keelung Chang Gung Memorial Hospital, Keelung, Taiwan

<sup>3</sup> Division of Hepatogastroenterology, Department of Internal Medicine, Kaohsiu Chang Gung Memorial Hospital and Chang Gung University College of Medicine, Kao-hsiung, Taiwan

<sup>4</sup> College of Medicine, Chang-Gung University, Taoyuan, Taiwan

<sup>5</sup> School of Traditional Chinese Medicine, Chang-Gung University, Taoyuan, Taiwan

<sup>6</sup> Research Center of Industry of Human Ecology, Chang-Gung University of Science and Technology, Taoyuan, Taiwan

<sup>7</sup> Department of Biochemistry & Molecular Biology and Graduate Institute of Biomedical Sciences, College of Medicine, Chang Gung University, Taoyuan, Taiwan

<sup>8</sup> Molecular Medicine Research Center, Chang-Gung University, Taoyuan, Taiwan

<sup>+</sup>These authors contribute equally to this work.

**Table S1. miRNA levels of the training (n = 220) and validation (n = 110) groups.** 2:1 randomization were performed to divide the dataset into two partitions. No significant difference was found between the two partitions.

|             | Training |                   | Validation |                   | <i>P</i> |
|-------------|----------|-------------------|------------|-------------------|----------|
|             | Median   | ( min , max )     | Median     | ( min , max )     |          |
| miR-155     | 3.629    | ( 2.114 , 6.263 ) | 3.694      | ( 1.805 , 5.280 ) | 0.284    |
| miR-15a     | 4.326    | ( 2.414 , 5.647 ) | 4.411      | ( 2.519 , 6.026 ) | 0.503    |
| miR-15b     | 5.060    | ( 1.692 , 6.722 ) | 4.890      | ( 1.385 , 6.262 ) | 0.606    |
| miR-21      | 5.064    | ( 1.196 , 6.456 ) | 5.101      | ( 2.561 , 6.799 ) | 0.638    |
| miR-221     | 5.549    | ( 3.173 , 7.031 ) | 5.527      | ( 3.317 , 7.319 ) | 0.867    |
| miR-29a     | 4.234    | ( 1.458 , 5.647 ) | 4.255      | ( 1.789 , 5.685 ) | 0.738    |
| miR-30b     | 5.281    | ( 2.545 , 7.508 ) | 5.342      | ( 2.766 , 7.207 ) | 0.933    |
| miR-30c     | 5.363    | ( 2.646 , 7.121 ) | 5.456      | ( 1.883 , 7.699 ) | 0.729    |
| miR-381     | 4.124    | ( 2.088 , 6.389 ) | 4.103      | ( 2.309 , 6.500 ) | 0.454    |
| miR-432     | 3.996    | ( 0.538 , 7.282 ) | 3.875      | ( 1.467 , 6.337 ) | 0.259    |
| miR-486-3p  | 3.981    | ( 2.588 , 5.188 ) | 3.996      | ( 1.932 , 5.906 ) | 0.648    |
| miR-876-5p  | 3.747    | ( 2.124 , 6.717 ) | 3.794      | ( 1.956 , 5.829 ) | 0.970    |
| let-7g      | 4.995    | ( 3.066 , 6.565 ) | 5.052      | ( 3.117 , 7.029 ) | 0.980    |
| miR-122     | 4.026    | ( 2.328 , 6.132 ) | 4.057      | ( 2.048 , 5.933 ) | 0.981    |
| miR-139-5p  | 4.648    | ( 2.399 , 6.011 ) | 4.611      | ( 2.510 , 6.568 ) | 0.713    |
| miR-203     | 2.490    | ( 0.356 , 5.183 ) | 2.415      | ( 0.486 , 4.455 ) | 0.239    |
| miR-18a     | 4.003    | ( 1.010 , 6.111 ) | 4.060      | ( 0.486 , 5.486 ) | 0.980    |
| miR-338-3p  | 2.555    | ( 0.494 , 6.130 ) | 2.555      | ( 0.486 , 4.191 ) | 0.810    |
| miR-125b    | 4.489    | ( 2.848 , 6.802 ) | 4.506      | ( 3.039 , 6.005 ) | 0.292    |
| miR-126     | 5.556    | ( 1.344 , 7.293 ) | 5.631      | ( 1.385 , 7.612 ) | 0.995    |
| miR-199b-5p | 3.189    | ( 1.248 , 6.963 ) | 3.232      | ( 1.735 , 4.898 ) | 0.386    |
| miR-222     | 4.977    | ( 2.001 , 6.489 ) | 4.974      | ( 2.636 , 6.863 ) | 0.954    |
| miR-223     | 6.554    | ( 3.038 , 8.139 ) | 6.567      | ( 3.507 , 8.220 ) | 0.902    |
| miR-25      | 5.823    | ( 3.630 , 7.276 ) | 5.899      | ( 3.875 , 7.889 ) | 0.226    |
| miR-26a     | 5.307    | ( 2.273 , 7.046 ) | 5.380      | ( 2.838 , 7.241 ) | 0.983    |
| miR-192     | 3.648    | ( 1.125 , 5.178 ) | 3.694      | ( 1.289 , 5.484 ) | 0.393    |
| miR-27a     | 4.962    | ( 1.123 , 7.072 ) | 4.942      | ( 2.201 , 7.069 ) | 0.718    |
| miR-124     | 3.844    | ( 1.423 , 5.109 ) | 3.858      | ( 2.744 , 5.510 ) | 0.390    |

**Table S2. Multivariate logistic regression analysis of the miRNA-HCC score and the simplified R.E.V.E.A.L. HCC score for the classification of cirrhotic and HCC patients.**

|                 | <b>Multivariate logistic regression</b> |            |                   |              |
|-----------------|-----------------------------------------|------------|-------------------|--------------|
|                 | Beta                                    | Odds ratio | ( 95% CI )        | P            |
| miRNA-HCC score | 1.201                                   | 3.323      | ( 1.564 — 7.063 ) | <b>0.002</b> |
| REVEAL score    | 0.217                                   | 1.242      | ( 1.068 — 1.445 ) | <b>0.005</b> |

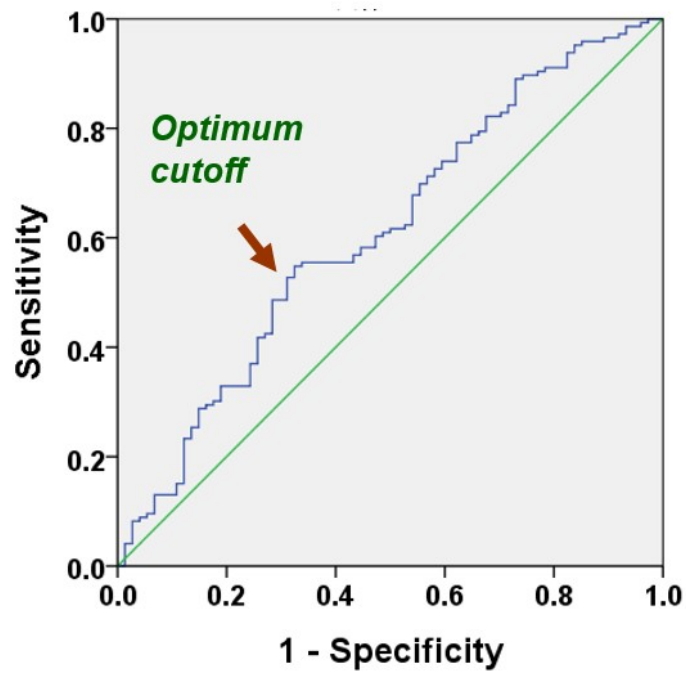

**Figure S1.** The receiver operating characteristic curve of the etiology score in the classification of cirrhotic patients with distinct etiologies in the training dataset (N = 220). The area under the curve is 61.1%,  $P = 0.007$ . The brown arrow indicated the optimum cutting point when the score is 0, where the Youden's J statistics is maximized.

(A)

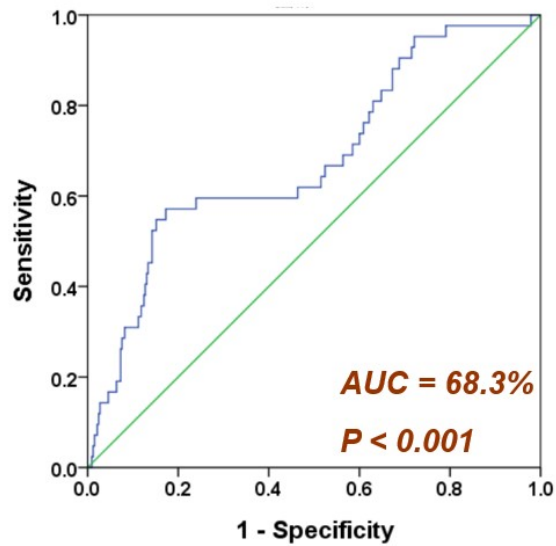

(B)

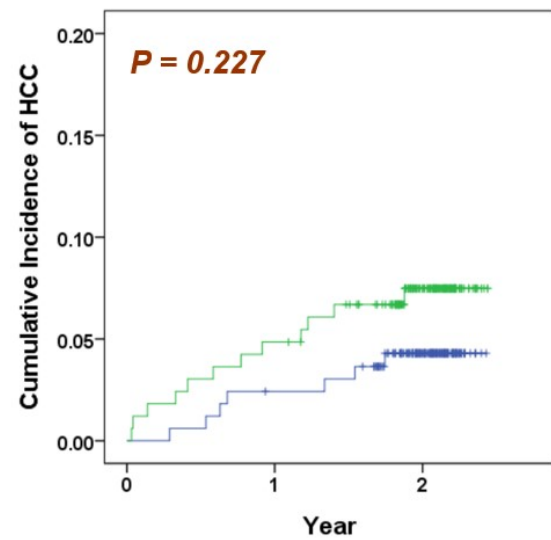

**Figure S2. Cross-sectional classification and longitudinal time-to-HCC analysis of the support vector machine model.** (A) Cross-sectional classification; (B) Longitudinal time-to-HCC analysis. Green: the cumulative HCC incidence of the higher-risk patient stratum (N = 165); Blue: the cumulative HCC incidence of the lower-risk patient stratum (N = 165).

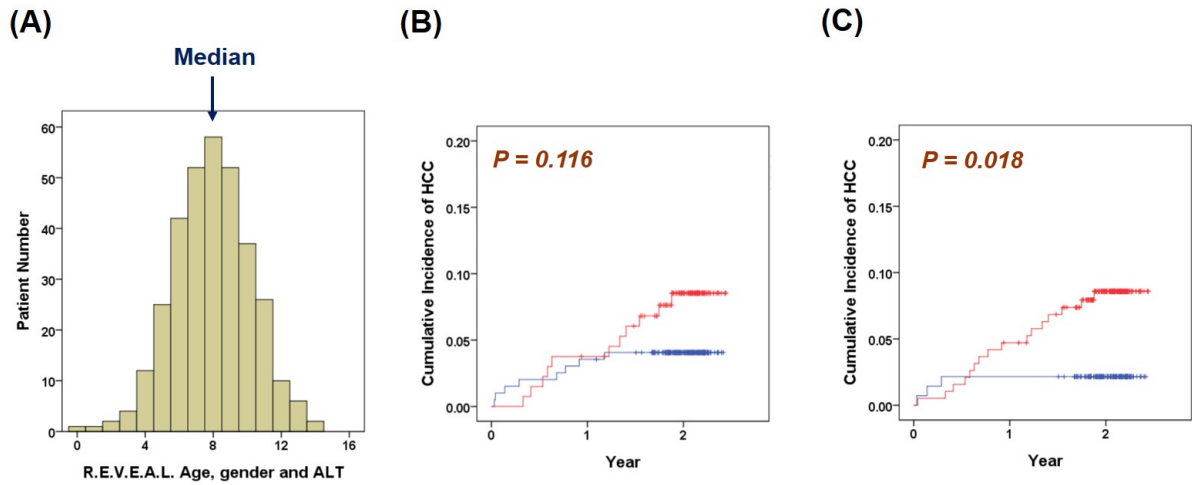

**Figure S3. The evaluation of HCC risks using the age, gender and ALT elements in the R.E.V.E.A.L. model.** (A) The risk score distribution of the cirrhosis patient cohort (N = 330). The median value was 8. (B) The Kaplan-Meier plot of the cumulative incidence of HCC in the high- and low-risk groups shown by red and blue colors respectively. The high-risk group was defined when score > 8 (N = 133), while the low-risk group was defined as score ≤ 8 (N = 197). No statistically significant difference in the cumulative incidence of HCC was found between the two groups (log-rank P = 0.116). (C) The high-risk group was defined when score ≥ 8 (N = 191), while the low-risk group was defined as score < 8 (N = 139). Significant difference was found between the two groups (log-rank P = 0.018).

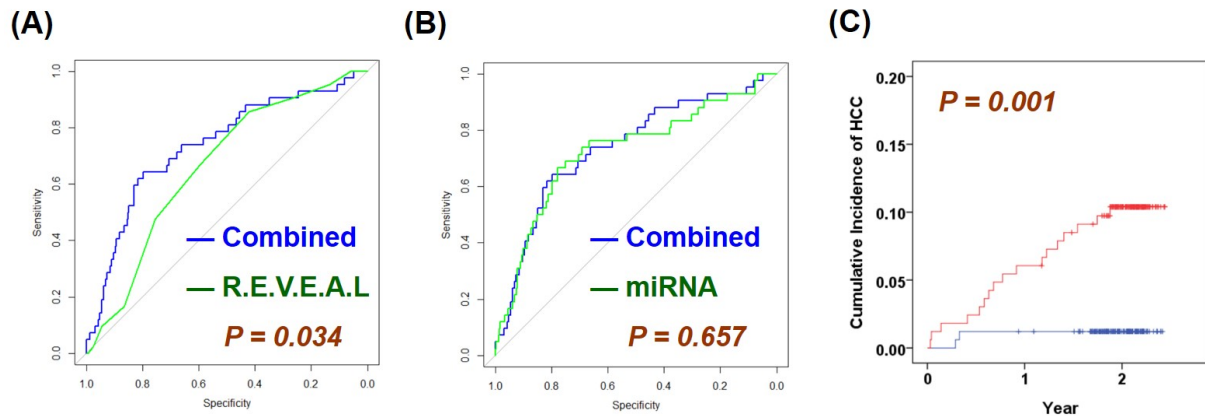

**Fig S4. Evaluation of the combination of simplified R.E.V.E.A.L. score and the miRNA HCC score using the multivariate logistic regression method.** (A) The ROC curves of the simplified R.E.V.E.A.L. score (AUC = 66.4%) and the combined score (AUC = 73.8%) for the classification of liver cirrhotic and HCC patients. Significance level of the differences between the two ROC curves was 0.034, estimated by a bootstrap test with 2000 times of re-sampling. (B) No significant difference was found between the ROC curves of the miRNA score (AUC = 72.5%) and the combined score (AUC = 73.8%,  $P = 0.657$ ). (C) The Kaplan-Meier plot of the cumulative incidence of HCC of high- and low-risk patients ( $N = 165$  for each group) based on the combined score. Significant difference was found between the two groups (log-rank  $P = 0.001$ ).

(A)

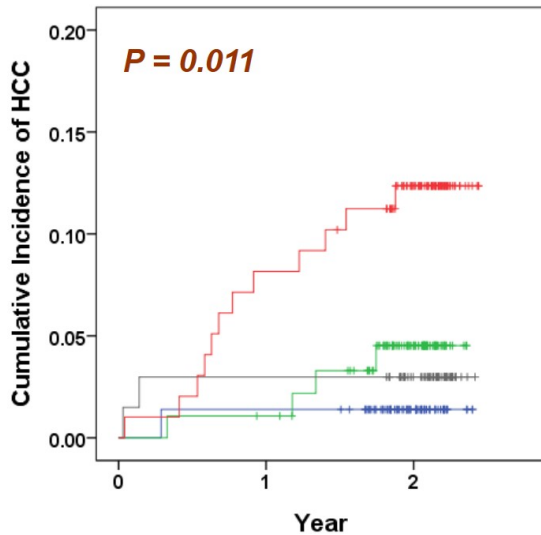

(B)

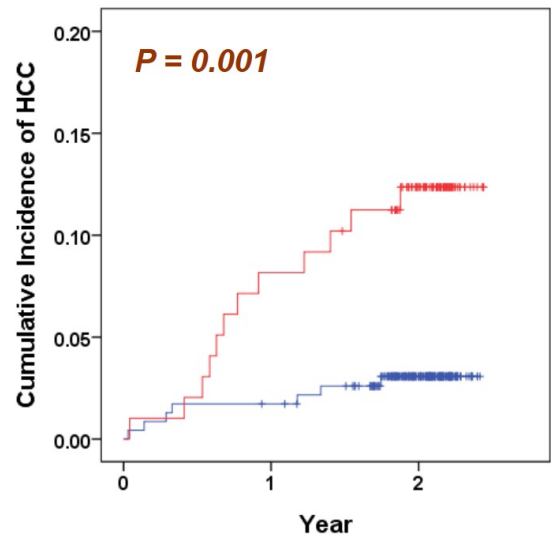

**Figure S5. The Kaplan-Meier plots of patient strata by use of both the miRNA model and the R.E.V.E.A.L-age-gender-ALT model (score  $\geq 8$  vs.  $< 8$ ).** (A) Red: patients identified as high-risk in both models (N = 98). Gray: patients identified as high-risk in the miRNA model but as low-risk in the R.E.V.E.A.L. model (N = 67); Green: patients identified as low-risk in the miRNA model but as high-risk in the R.E.V.E.A.L. model (N = 93); Blue: patients identified as low-risk in both models (N = 72). (B) Comparing high-risk patients identified by both models (N = 98) and the other patients (N = 232). Significant difference was found between the two groups (log-rank P = 0.001).
